# Supplementary material for: Structure- and temperature-sensitive photoluminescence in a novel phosphate red phosphor RbZnPO4:Eu3+
Source: Royal Society of Chemistry journal article supplement (doi:10.1039/c5dt02099a), 2015-01-01
Supplement: c5dt02099a1.pdf [file c5dt02099a1.pdf]

Supporting Information

**Structure and temperature sensitive photoluminescence in a  
novel phosphate phosphor  $\text{RbZnPO}_4:\text{Eu}^{3+}$**

**Shuangyu Xin, Yuhua Wang\*, Ge Zhu, Xin Ding, Wanying Geng, Qian Wang**

*Received (in XXX, XXX) Xth XXXXXXXXXX 20XX, Accepted Xth XXXXXXXXXX 20XX*

DOI: 10.1039/b000000x

Table S1 The refinement results of the selective interatomic distances of Rb-O and Zn-O in

| RbZnPO <sub>4</sub> |        |          |        |        |          |
|---------------------|--------|----------|--------|--------|----------|
| Center              | Ligand | distance | Center | Ligand | distance |
| Rb1                 | O5     | 2.7583   | Zn1    | O7     | 1.8473   |
|                     | O4     | 2.8143   |        | O4     | 1.9130   |
|                     | O3     | 2.8298   |        | O5     | 1.9851   |
|                     | O2     | 2.9499   |        | O10    | 2.1676   |
|                     | O8     | 3.1394   |        | O10    | 2.9634   |
|                     | O8     | 3.3336   | mean   | Zn1-O  | 2.89834  |
| mean                | Rb1-O  | 2.9708   | Zn2    | O8     | 1.9240   |
| Rb2                 | O6     | 2.4493   |        | O4     | 1.9270   |
|                     | O1     | 2.7433   |        | O1     | 1.9315   |
|                     | O6     | 2.7688   |        | O3     | 1.9520   |
|                     | O7     | 3.1415   |        | mean   | Zn2-O    |
|                     | O1     | 3.1900   |        |        |          |
|                     | O7     | 3.1901   |        |        |          |
|                     | O4     | 3.2747   |        |        |          |
|                     | O3     | 3.3393   |        |        |          |
| mean                | Rb2-O  | 3.0121   |        |        |          |

Table S2 The effective ionic radii of Rb<sup>+</sup>, Zn<sup>2+</sup> and Eu<sup>3+</sup> ions with different coordination numbers.

|                | Rb <sup>+</sup> (Å) | Zn <sup>2+</sup> (Å) | Eu <sup>3+</sup> (Å) |
|----------------|---------------------|----------------------|----------------------|
| 6 coordination | 1.52                | -                    | 0.947                |
| 8 coordination | 1.61                | -                    | 1.066                |
| 4 coordination | -                   | 0.6                  | <0.947               |
| 5 coordination | -                   | 0.68                 | <0.947               |

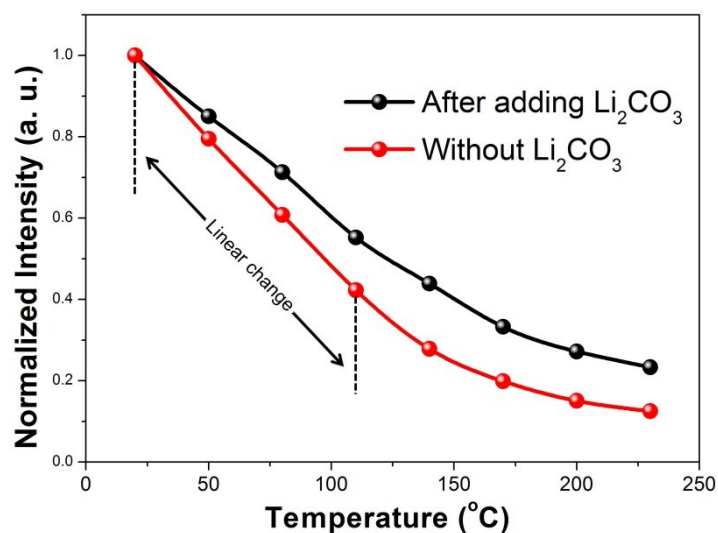

Figure S1 The relationship between the sample temperature and the normalized emission intensity of RbZnPO<sub>4</sub>:0.05Eu<sup>3+</sup> and RbZnPO<sub>4</sub>:0.05Eu<sup>3+</sup>, 0.05Li<sup>+</sup>.
